# Supplementary material for: Cardiac and Neurological Complications Post COVID-19 Vaccination: A Systematic Review of Case Reports and Case Series
Source: MDPI journal article supplement (doi:10.3390/vaccines12060575), 2024-05-24
Supplement: s1 [file s1]

Supplementary S1: PRISMA checklist

| Section and Topic             | Item # | Checklist item                                                                                                                                                                                                                                                                                       | Location where item is reported |
|-------------------------------|--------|------------------------------------------------------------------------------------------------------------------------------------------------------------------------------------------------------------------------------------------------------------------------------------------------------|---------------------------------|
| <b>TITLE</b>                  |        |                                                                                                                                                                                                                                                                                                      |                                 |
| Title                         | 1      | Identify the report as a systematic review.                                                                                                                                                                                                                                                          | 1                               |
| <b>ABSTRACT</b>               |        |                                                                                                                                                                                                                                                                                                      |                                 |
| Abstract                      | 2      | See the PRISMA 2020 for Abstracts checklist.                                                                                                                                                                                                                                                         | 1                               |
| <b>INTRODUCTION</b>           |        |                                                                                                                                                                                                                                                                                                      |                                 |
| Rationale                     | 3      | Describe the rationale for the review in the context of existing knowledge.                                                                                                                                                                                                                          | 1                               |
| Objectives                    | 4      | Provide an explicit statement of the objective(s) or question(s) the review addresses.                                                                                                                                                                                                               | 1                               |
| <b>METHODS</b>                |        |                                                                                                                                                                                                                                                                                                      |                                 |
| Eligibility criteria          | 5      | Specify the inclusion and exclusion criteria for the review and how studies were grouped for the syntheses.                                                                                                                                                                                          | 2                               |
| Information sources           | 6      | Specify all databases, registers, websites, organisations, reference lists and other sources searched or consulted to identify studies. Specify the date when each source was last searched or consulted.                                                                                            | 2                               |
| Search strategy               | 7      | Present the full search strategies for all databases, registers and websites, including any filters and limits used.                                                                                                                                                                                 | 2                               |
| Selection process             | 8      | Specify the methods used to decide whether a study met the inclusion criteria of the review, including how many reviewers screened each record and each report retrieved, whether they worked independently, and if applicable, details of automation tools used in the process.                     | 2                               |
| Data collection process       | 9      | Specify the methods used to collect data from reports, including how many reviewers collected data from each report, whether they worked independently, any processes for obtaining or confirming data from study investigators, and if applicable, details of automation tools used in the process. | 2                               |
| Data items                    | 10a    | List and define all outcomes for which data were sought. Specify whether all results that were compatible with each outcome domain in each study were sought (e.g. for all measures, time points, analyses), and if not, the methods used to decide which results to collect.                        | 2                               |
|                               | 10b    | List and define all other variables for which data were sought (e.g. participant and intervention characteristics, funding sources). Describe any assumptions made about any missing or unclear information.                                                                                         | 2                               |
| Study risk of bias assessment | 11     | Specify the methods used to assess risk of bias in the included studies, including details of the tool(s) used, how many reviewers assessed each study and whether they worked independently, and if applicable, details of automation tools used in the process.                                    | N/A                             |
| Effect measures               | 12     | Specify for each outcome the effect measure(s) (e.g. risk ratio, mean difference) used in the synthesis or presentation of results.                                                                                                                                                                  | 3                               |
| Synthesis methods             | 13a    | Describe the processes used to decide which studies were eligible for each synthesis (e.g. tabulating the study intervention characteristics and comparing against the planned groups for each synthesis (item #5)).                                                                                 | 3                               |
|                               | 13b    | Describe any methods required to prepare the data for presentation or synthesis, such as handling of missing summary statistics, or data conversions.                                                                                                                                                | 3                               |
|                               | 13c    | Describe any methods used to tabulate or visually display results of individual studies and syntheses.                                                                                                                                                                                               | 3                               |
|                               | 13d    | Describe any methods used to synthesize results and provide a rationale for the choice(s). If meta-analysis was performed, describe the model(s), method(s) to identify the presence and extent of statistical heterogeneity, and software package(s) used.                                          | 3                               |

| Section and Topic             | Item # | Checklist item                                                                                                                                                                                                                                                                       | Location where item is reported |
|-------------------------------|--------|--------------------------------------------------------------------------------------------------------------------------------------------------------------------------------------------------------------------------------------------------------------------------------------|---------------------------------|
|                               | 13e    | Describe any methods used to explore possible causes of heterogeneity among study results (e.g. subgroup analysis, meta-regression).                                                                                                                                                 | N/A                             |
|                               | 13f    | Describe any sensitivity analyses conducted to assess robustness of the synthesized results.                                                                                                                                                                                         | N/A                             |
| Reporting bias assessment     | 14     | Describe any methods used to assess risk of bias due to missing results in a synthesis (arising from reporting biases).                                                                                                                                                              | N/A                             |
| Certainty assessment          | 15     | Describe any methods used to assess certainty (or confidence) in the body of evidence for an outcome.                                                                                                                                                                                | N/A                             |
| <b>RESULTS</b>                |        |                                                                                                                                                                                                                                                                                      |                                 |
| Study selection               | 16a    | Describe the results of the search and selection process, from the number of records identified in the search to the number of studies included in the review, ideally using a flow diagram.                                                                                         | 3                               |
|                               | 16b    | Cite studies that might appear to meet the inclusion criteria, but which were excluded, and explain why they were excluded.                                                                                                                                                          | 3                               |
| Study characteristics         | 17     | Cite each included study and present its characteristics.                                                                                                                                                                                                                            | 3                               |
| Risk of bias in studies       | 18     | Present assessments of risk of bias for each included study.                                                                                                                                                                                                                         | N/A                             |
| Results of individual studies | 19     | For all outcomes, present, for each study: (a) summary statistics for each group (where appropriate) and (b) an effect estimate and its precision (e.g. confidence/credible interval), ideally using structured tables or plots.                                                     | Supplementary 1 and 2           |
| Results of syntheses          | 20a    | For each synthesis, briefly summarise the characteristics and risk of bias among contributing studies.                                                                                                                                                                               | Table 1 and 2                   |
|                               | 20b    | Present results of all statistical syntheses conducted. If meta-analysis was done, present for each the summary estimate and its precision (e.g. confidence/credible interval) and measures of statistical heterogeneity. If comparing groups, describe the direction of the effect. | Table 3 and 4                   |
|                               | 20c    | Present results of all investigations of possible causes of heterogeneity among study results.                                                                                                                                                                                       | 4                               |
|                               | 20d    | Present results of all sensitivity analyses conducted to assess the robustness of the synthesized results.                                                                                                                                                                           | N/A                             |
| Reporting biases              | 21     | Present assessments of risk of bias due to missing results (arising from reporting biases) for each synthesis assessed.                                                                                                                                                              | N/A                             |
| Certainty of evidence         | 22     | Present assessments of certainty (or confidence) in the body of evidence for each outcome assessed.                                                                                                                                                                                  | N/A                             |
| <b>DISCUSSION</b>             |        |                                                                                                                                                                                                                                                                                      |                                 |
| Discussion                    | 23a    | Provide a general interpretation of the results in the context of other evidence.                                                                                                                                                                                                    | 4-7                             |
|                               | 23b    | Discuss any limitations of the evidence included in the review.                                                                                                                                                                                                                      | 7                               |
|                               | 23c    | Discuss any limitations of the review processes used.                                                                                                                                                                                                                                | 7                               |
|                               | 23d    | Discuss implications of the results for practice, policy, and future research.                                                                                                                                                                                                       | 7                               |
| <b>OTHER INFORMATION</b>      |        |                                                                                                                                                                                                                                                                                      |                                 |

| Section and Topic                              | Item # | Checklist item                                                                                                                                                                                                                             | Location where item is reported |
|------------------------------------------------|--------|--------------------------------------------------------------------------------------------------------------------------------------------------------------------------------------------------------------------------------------------|---------------------------------|
| Registration and protocol                      | 24a    | Provide registration information for the review, including register name and registration number, or state that the review was not registered.                                                                                             | 7-8                             |
|                                                | 24b    | Indicate where the review protocol can be accessed, or state that a protocol was not prepared.                                                                                                                                             | 7-8                             |
|                                                | 24c    | Describe and explain any amendments to information provided at registration or in the protocol.                                                                                                                                            | 7-8                             |
| Support                                        | 25     | Describe sources of financial or non-financial support for the review, and the role of the funders or sponsors in the review.                                                                                                              | 8                               |
| Competing interests                            | 26     | Declare any competing interests of review authors.                                                                                                                                                                                         | 8                               |
| Availability of data, code and other materials | 27     | Report which of the following are publicly available and where they can be found: template data collection forms; data extracted from included studies; data used for all analyses; analytic code; any other materials used in the review. | 8                               |

| Supplementary S2: Search strategies (searches were performed on 14 February 2022). |                                                                                                                                                                                                                                                                                                 |           |                      |              |
|------------------------------------------------------------------------------------|-------------------------------------------------------------------------------------------------------------------------------------------------------------------------------------------------------------------------------------------------------------------------------------------------|-----------|----------------------|--------------|
|                                                                                    |                                                                                                                                                                                                                                                                                                 | PubMed    | Medline via Ebscohot | Scopus       |
| 1                                                                                  | COVID-19 vaccine                                                                                                                                                                                                                                                                                | 4903      | 16, 181              | 54, 705      |
| 2                                                                                  | Safety OR adverse event OR adverse reaction OR side-effect OR complication OR manifestation OR impairment OR disorder OR disease                                                                                                                                                                | 5,024,891 | 6, 752, 246          | 1, 912, 149  |
| 3                                                                                  | Nervous system OR neurological                                                                                                                                                                                                                                                                  | 533,241   | 526, 892             | 2, 368, 095  |
| 4                                                                                  | Cardiovascular OR heart                                                                                                                                                                                                                                                                         | 1,289,867 | 1, 259, 936          | 6, 142, 793  |
| 5                                                                                  | review OR systematic review OR meta-analysis                                                                                                                                                                                                                                                    | 1,983,732 | 2, 095, 855          | 33, 258, 453 |
| 6                                                                                  | (Nervous system OR neurological)<br>OR (Cardiovascular OR heart)                                                                                                                                                                                                                                | 1,784,381 | 1, 748, 574          | 7, 989, 924  |
| 7                                                                                  | ( COVID-19 vaccine) AND<br>( Safety OR adverse event OR adverse reaction OR side-effect OR complication OR manifestation OR impairment OR disorder OR disease)<br>AND<br>(Nervous system OR neurological)<br>OR (Cardiovascular OR heart)<br>NOT (review OR systematic review OR meta-analysis) | 80        | 283                  | 202          |

Supplementary S3: Detailed description of studies reporting cases with cardiac complications following COVID-19 vaccination (n = 134).

| Author [reference]         | Year | Country      | Number of cases | Age range | Gender       | Vaccines                    | Diagnosis                                                                    | Outcome                  |
|----------------------------|------|--------------|-----------------|-----------|--------------|-----------------------------|------------------------------------------------------------------------------|--------------------------|
| Abbate et al., [1]         | 2021 | USA          | 2               | 27-34     | M (1); F (1) | Pfizer (2)                  | Pericarditis (1); Myopericarditis (1)                                        | Discharged (1); Died (1) |
| Ahmed et al., [2]          | 2022 | Iraq         | 7               | 16-36     | M (7)        | Pfizer (5); Moderna (2)     | Myocarditis (7)                                                              | Discharged (7)           |
| Aiba et al., [3]           | 2021 | Japan        | 1               | 46        | F (1)        | Pfizer (1)                  | Premature ventricular contraction; Non-sustained ventricular tachycardia (1) | Not described (1)        |
| Albert et al., [4]         | 2021 | USA          | 1               | 24        | M (1)        | Moderna (1)                 | Myocarditis (1)                                                              | Discharged (1)           |
| Alizadeh et al., [5]       | 2022 | Germany      | 1               | 29        | M (1)        | Astrazeneca (1)             | Myocarditis (1)                                                              | Discharged (1)           |
| Allam et al., [6]          | 2022 | Lebanon      | 1               | 64        | M (1)        | Pfizer (1)                  | Kounis syndrome (1)                                                          | Not described (1)        |
| Al-Rasbi et al., [7]       | 2022 | Oman         | 1               | 37        | M (1)        | Pfizer (1)                  | Myocarditis (1)                                                              | Discharged (1)           |
| Ambati et al., [8]         | 2021 | USA          | 2               | 16-17     | M (2)        | Pfizer (2)                  | Myopericarditis (2)                                                          | Discharged (2)           |
| Ameratunga et al., [9]     | 2022 | New Zealand  | 1               | 57        | F (1)        | Pfizer (1)                  | Myocarditis (1)                                                              | Died (1)                 |
| Ansari et al., [10]        | 2022 | Germany      | 1               | 23        | M (1)        | Moderna (1)                 | Myocarditis (1)                                                              | Discharged (1)           |
| Ashaari et al., [11]       | 2021 | Ireland      | 1               | 66        | M (1)        | Pfizer (1)                  | Pericarditis (1)                                                             | Discharged (1)           |
| Azdaki et al., [12]        | 2021 | Iran         | 1               | 70        | M (1)        | Astrazeneca (1)             | Myocarditis (1)                                                              | Not described (1)        |
| Bae et al., [13]           | 2022 | South Korea  | 1               | 38        | F (1)        | Moderna (1)                 | Myocarditis (1)                                                              | Discharged (1)           |
| Bartlett et al., [14]      | 2021 | USA          | 1               | 46        | M (1)        | Pfizer (1)                  | Myopericarditis (1)                                                          | Discharged (1)           |
| Bengal et al., [15]        | 2022 | Germany      | 2               | 20-23     | M (2)        | Moderna (2)                 | Myocarditis (2)                                                              | Discharged (2)           |
| Beshai et al., [16]        | 2022 | USA          | 1               | 45        | M (1)        | Moderna (1)                 | Takotsubo Cardiomyopathy                                                     | Discharged (1)           |
| Boivin et al., [17]        | 2021 | USA          | 1               | 96        | F (1)        | Moderna (1)                 | Myocardial infarction (1)                                                    | Discharged (1)           |
| Boscolo et al., [18]       | 2021 | Switzerland  | 1               | 63        | F (1)        | Moderna (1)                 | Takotsubo Cardiomyopathy (1)                                                 | Not described (1)        |
| Cereda et al., [19]        | 2021 | Italy        | 1               | 21        | M (1)        | Pfizer (1)                  | Myocarditis (1)                                                              | Discharged (1)           |
| Ceylan et al., [20]        | 2022 | Turkey       | 1               | 57        | F (1)        | Pfizer (1)                  | Myocarditis (1)                                                              | Discharged (1)           |
| Chachar et al., [21]       | 2021 | Bahrain      | 1               | 24        | M (1)        | Pfizer (1)                  | Myocarditis (1)                                                              | Discharged (1)           |
| Chamling et al., [22]      | 2021 | Germany      | 3               | 20-68     | M (2); F (1) | Pfizer (2); Astrazeneca (1) | Myocarditis (3)                                                              | Not described (3)        |
| Chatterjee et al., [23]    | 2021 | India        | 1               | 63        | M (1)        | Astrazeneca (1)             | Myocardial infarction (1)                                                    | Discharged (1)           |
| Chelala et al., [24]       | 2022 | USA          | 5               | 16-19     | M (5)        | Pfizer (4); Moderna (1)     | Myocarditis (5)                                                              | Discharged (5)           |
| Chellapandian et al., [25] | 2022 | Qatar        | 1               | 22        | M (1)        | Moderna (1)                 | Myocarditis (1)                                                              | Discharged (1)           |
| Choi et al., [26]          | 2021 | South Korea  | 1               | 22        | M (1)        | Pfizer (1)                  | Myocarditis (1)                                                              | Died (1)                 |
| Crane et al., [27]         | 2021 | Australia    | 1               | 72        | M (1)        | Astrazeneca (1)             | Takotsubo Cardiomyopathy (1)                                                 | Discharged (1)           |
| D'Angelo et al., [28]      | 2021 | Italy        | 1               | 30        | M (1)        | Pfizer (1)                  | Myocarditis (1)                                                              | Discharged (1)           |
| Dlewati et al., [29]       | 2022 | USA          | 1               | 48        | M (1)        | Moderna (1)                 | Myocarditis (1)                                                              | Discharged (1)           |
| Ehrlich et al., [30]       | 2021 | Germany      | 1               | 40        | M (1)        | Pfizer (1)                  | Myocarditis (1)                                                              | Discharged (1)           |
| Elheet et al., [31]        | 2022 | Saudi Arabia | 1               | 32        | M (1)        | Astrazeneca (1)             | Myocardial infarction (1)                                                    | Discharged (1)           |
| Fearon et al., [32]        | 2021 | USA          | 1               | 73        | F (1)        | Moderna (1)                 | Takotsubo syndrome (1)                                                       | Discharged (1)           |
| Federico et al., [33]      | 2022 | Italy        | 1               | 32        | M (1)        | Moderna (1)                 | Pericarditis (1)                                                             | Discharged (1)           |
| Freise et al., [34]        | 2022 | Germany      | 8               | 13-56     | M (5); F (3) | Pfizer (5); Moderna (3)     | Myocarditis (4); undetermined of myocarditis or                              | Discharged (4); Not      |

|                           |      |             |   |       |              |                             |                                                                   |                                   |
|---------------------------|------|-------------|---|-------|--------------|-----------------------------|-------------------------------------------------------------------|-----------------------------------|
|                           |      |             |   |       |              |                             | pericarditis (4)                                                  | described (4)                     |
| Gautam et al., [35]       | 2021 | USA         | 1 | 66    | M (1)        | Pfizer (1)                  | Myocarditis (1)                                                   | Discharged (1)                    |
| Gill et al., [36]         | 2022 | USA         | 1 | 44    | M (1)        | Moderna (1)                 | Myopericarditis (1)                                               | Discharged (1)                    |
| Giublin et al., [37]      | 2022 | Brazil      | 1 | 18    | M (1)        | Pfizer (1)                  | Myopericarditis (1)                                               | Discharged (1)                    |
| Habedank et al., [38]     | 2022 | Germany     | 1 | 60    | M (1)        | Moderna (1)                 | Myocarditis (1)                                                   | Discharged (1)                    |
| Habib et al., [39]        | 2021 | Qatar       | 1 | 37    | M (1)        | Pfizer (1)                  | Myocarditis (1)                                                   | Discharged (1)                    |
| Hassanzadeh et al., [40]  | 2022 | Iran        | 1 | 32    | F (1)        | Astrazeneca (1)             | Myocarditis (1)                                                   | Discharged (1)                    |
| Hinton et al., [41]       | 2021 | UK          | 1 | 38    | M (1)        | Pfizer (1)                  | Coronary thrombosis (1)                                           | Discharged (1)                    |
| Hryniewicki et al., [42]  | 2022 | USA         | 1 | 18    | M (1)        | Pfizer (1)                  | Pericarditis                                                      | Discharged (1)                    |
| Huang et al., [43]        | 2022 | Taiwan      | 3 | 78-89 | M (1); F (2) | Astrazeneca (3)             | Myocardial infarction (3)                                         | Discharged (3)                    |
| Hung et al., [44]         | 2021 | Taiwan      | 1 | 23    | M (1)        | Astrazeneca (1)             | Myopericarditis (1)                                               | Discharged (1)                    |
| Imran et al., [45]        | 2022 | USA         | 1 | 30    | M (1)        | Unspecific mRNA vaccine (1) | Myocardial fibrosis (1)                                           | Discharged (1)                    |
| Iqbal et al., [46]        | 2022 | Pakistan    | 1 | 61    | M (1)        | Moderna (1)                 | Myocardial infarction (1)                                         | Discharged (1)                    |
| Issak et al., [47]        | 2021 | Germany     | 1 | 15    | M (1)        | Pfizer (1)                  | Myocarditis (1)                                                   | Discharged (1)                    |
| Iwamuro et al., [48]      | 2022 | Japan       | 1 | 17    | M (1)        | Moderna (1)                 | Myocarditis (1)                                                   | Discharged (1)                    |
| Jani et al., [49]         | 2021 | UK          | 1 | 65    | F (1)        | Moderna (1)                 | Takotsubo Cardiomyopathy (1)                                      | Discharged (1)                    |
| Javed et al., [50]        | 2022 | USA         | 1 | 64    | M (1)        | Moderna (1)                 | Hemorrhagic pleuropericarditis (1)                                | Discharged (1)                    |
| Kadwalwala et al., [51]   | 2021 | USA         | 1 | 38    | M (1)        | Moderna (1)                 | Myocarditis and cardiogenic shock (1)                             | Discharged (1)                    |
| Kaneta et al., [52]       | 2022 | Japan       | 1 | 25    | M (1)        | Moderna (1)                 | Myocarditis (1)                                                   | Discharged (1)                    |
| Kang et al., [53]         | 2022 | South Korea | 1 | 48    | F (1)        | Pfizer (1)                  | Myocarditis (1)                                                   | Discharged (1)                    |
| Kaul et al., [54]         | 2021 | USA         | 2 | 21-28 | M (2)        | Pfizer (1); Moderna (1)     | Myocarditis (2)                                                   | Discharged (2)                    |
| Kawakami et al., [55]     | 2022 | Japan       | 1 | 45    | F (1)        | Moderna (1)                 | Myocarditis (1)                                                   | Discharged (1)                    |
| Kawano et al., [56]       | 2022 | Japan       | 1 | 60    | F (1)        | Pfizer (1)                  | Myocarditis (1)                                                   | Discharged (1)                    |
| Kazama et al., [57]       | 2022 | Japan       | 1 | 48    | F (1)        | Moderna (1)                 | Myocarditis (1)                                                   | Discharged (1)                    |
| Khogali et al., [58]      | 2021 | Qatar       | 1 | 29    | F (1)        | Moderna (1)                 | Perimyocarditis (1)                                               | Discharged (1)                    |
| Kim HW et al., [59]       | 2021 | South Korea | 4 | 23-70 | M (3); F (1) | Pfizer (2); Moderna (2)     | Myocarditis (4)                                                   | Discharged (4)                    |
| Kim IC et al., [60]       | 2021 | South Korea | 1 | 24    | M (1)        | Pfizer (1)                  | Myocarditis (1)                                                   | Not described (1)                 |
| Kim DW et al., [61]       | 2021 | South Korea | 1 | 29    | M (1)        | Pfizer (1)                  | Myopericarditis (1)                                               | Discharged (1)                    |
| Kimball et al., [62]      | 2022 | USA         | 1 | 57    | M (1)        | Pfizer (1)                  | Intermittent complete heart block with ventricular standstill (1) | Discharged (1)                    |
| Kimura et al., [63]       | 2022 | Japan       | 1 | 69    | M (1)        | Pfizer (1)                  | Myocarditis (1)                                                   | Discharged (1)                    |
| King et al., [64]         | 2021 | USA         | 4 | 20-30 | M (3); F (1) | Pfizer (1); Moderna (3)     | Myocarditis (4)                                                   | Discharged (4)                    |
| Koizumi et al., [65]      | 2021 | Japan       | 2 | 22-27 | M (2)        | Moderna (2)                 | Myocarditis (2)                                                   | Discharged (1); Not described (1) |
| Kojima et al., [66]       | 2022 | Japan       | 1 | 17    | M (1)        | Pfizer (1)                  | Myocarditis (1)                                                   | Discharged (1)                    |
| Korzeniowska et al., [67] | 2022 | Poland      | 1 | 65    | M (1)        | Pfizer (1)                  | Pericarditis (1)                                                  | Discharged (1)                    |
| Kumar et al., [68]        | 2021 | India       | 2 | 60-75 | M (2)        | Astrazeneca (2)             | Myocardial infarction (2)                                         | Recovering (2)                    |
| Larson et al., [69]       | 2021 | USA         | 8 | 21-56 | M (8)        | Pfizer (5); Moderna (3)     | Myocarditis (8)                                                   | Discharged (8)                    |
| Lazaros et al., [70]      | 2021 | Greece      | 8 | 46-76 | M (3); F (5) | Pfizer (5); Moderna (1);    | Pericarditis (8)                                                  | Recovering (8)                    |

|                           |      |              |   |       |                   |                             |                                                                      |                                          |
|---------------------------|------|--------------|---|-------|-------------------|-----------------------------|----------------------------------------------------------------------|------------------------------------------|
|                           |      |              |   |       |                   | Astrazeneca (2)             |                                                                      |                                          |
| Lee et al., [71]          | 2021 | Singapore    | 3 | 44-73 | F (3)             | Pfizer (3)                  | Myocardial injury (1); Cardiomyopathy (1); Myocardial infarction (1) | Not described (3)                        |
| Levin et al., [72]        | 2021 | Israel       | 7 | 18-24 | M (7)             | Pfizer (7)                  | Myocarditis (7)                                                      | Discharged (7)                           |
| Li et al., [73]           | 2021 | China        | 1 | 31    | M (1)             | Sinopharm (1)               | Atrial fibrillation (1)                                              | Not described (1)                        |
| Lim et al., [74]          | 2021 | South Korea  | 1 | 36    | F (1)             | Pfizer (1)                  | Myocarditis (1)                                                      | Discharged (1)                           |
| Loch et al., [75]         | 2021 | Malaysia     | 1 | 34    | M (1)             | Pfizer (1)                  | Myocarditis with intraventricular thrombus (1)                       | Discharged (1)                           |
| Mansour et al., [76]      | 2021 | USA          | 2 | 21-25 | M (1); F (1)      | Moderna (2)                 | Myocarditis (2)                                                      | Discharged (2)                           |
| Marshall et al., [77]     | 2021 | USA          | 7 | 14-19 | M (7)             | Pfizer (7)                  | Myocarditis (4); Myopericarditis (3)                                 | Discharged (7)                           |
| Marsukjai et al., [78]    | 2022 | Thailand     | 1 | 55    | F (1)             | Astrazeneca (1)             | Myocarditis (1)                                                      | Discharged (1)                           |
| Matta et al., [79]        | 2021 | USA          | 1 | 27    | M (1)             | Pfizer (1)                  | Myocarditis (1)                                                      | Discharged (1)                           |
| McLean et al., [80]       | 2021 | USA          | 1 | 16    | M (1)             | Pfizer (1)                  | Myopericarditis (1)                                                  | Discharged (1)                           |
| Mengesha et al., [81]     | 2022 | Israel       | 1 | 43    | F (1)             | Pfizer (1)                  | Myocarditis (1)                                                      | Discharged (1)                           |
| Mimouni et al., [82]      | 2022 | Morocco      | 1 | 14    | Not described (1) | Unspecific mRNA vaccine (1) | Myocarditis (1)                                                      | Discharged (1)                           |
| Minocha et al., [83]      | 2021 | USA          | 1 | 17    | M (1)             | Pfizer (1)                  | Recurrent Myocarditis (1)                                            | Discharged (1)                           |
| Miqdad et al., [84]       | 2021 | Saudi Arabia | 1 | 18    | M (1)             | Pfizer (1)                  | Myocarditis (1)                                                      | Discharged (1)                           |
| Mishra et al., [85]       | 2021 | India        | 1 | 68    | M (1)             | Astrazeneca (1)             | Myocardial Infarction (1)                                            | Discharged (1)                           |
| Misumi et al., [86]       | 2021 | Japan        | 1 | 59    | M (1)             | Pfizer (1)                  | Pericarditis (1)                                                     | Discharged (1)                           |
| Mizoguchi et al., [87]    | 2022 | Japan        | 1 | 88    | F (1)             | Pfizer (1)                  | Pleuropericarditis (1)                                               | Discharged (1)                           |
| Mouch et al., [88]        | 2021 | Israel       | 6 | 16-45 | M (6)             | Pfizer (6)                  | Myocarditis (6)                                                      | Discharged (6)                           |
| Murakami et al., [89]     | 2022 | Japan        | 2 | 27-38 | M (2)             | Pfizer (2)                  | Myocarditis (2)                                                      | Discharged (2)                           |
| Muthukumar et al., [90]   | 2021 | USA          | 1 | 52    | M (1)             | Moderna (1)                 | Myocarditis (1)                                                      | Discharged (1)                           |
| Nagasaka et al., [91]     | 2022 | Japan        | 1 | 23    | M (1)             | Pfizer (1)                  | Myocarditis (1)                                                      | Discharged (1)                           |
| Naghashzadeh et al., [92] | 2022 | Iran         | 1 | 29    | M (1)             | Sputnik V (1)               | Myocarditis (1)                                                      | Discharged (1)                           |
| Nakanishi et al., [93]    | 2022 | Japan        | 1 | 70    | F (1)             | Unspecific mRNA vaccine (1) | Pericarditis (1)                                                     | Discharged (1)                           |
| Nassar et al., [94]       | 2021 | USA          | 1 | 70    | F (1)             | Janssen (1)                 | Myocarditis (1)                                                      | Died (1)                                 |
| Ohnishi et al., [95]      | 2022 | Japan        | 1 | 26    | M (1)             | Pfizer (1)                  | Myocarditis (1)                                                      | Discharged (1)                           |
| Oka et al., [96]          | 2022 | Japan        | 1 | 50    | M (1)             | Pfizer (1)                  | Myocarditis (1)                                                      | Discharged (1)                           |
| Olagunju et al., [97]     | 2022 | USA          | 1 | 19    | M (1)             | Moderna (1)                 | Myocarditis (1)                                                      | Discharged (1)                           |
| Olmos et al., [98]        | 2022 | Canada       | 1 | 49    | F (1)             | Pfizer (1)                  | Myocarditis (1)                                                      | Transferred to rehabilitation centre (1) |
| Ozdemir et al., [99]      | 2021 | Turkey       | 1 | 41    | F (1)             | Sinovac (1)                 | Type 1 Kounis syndrome (1)                                           | Discharged (1)                           |
| Panthong et al., [100]    | 2022 | Thailand     | 2 | 48-50 | M (2)             | Sinovac (2)                 | Myocardial Infarction (2)                                            | Discharged (2)                           |
| Parmar et al., [101]      | 2022 | USA          | 4 | 19-53 | M (3); F (1)      | Moderna (4)                 | Myocarditis (4)                                                      | Discharged (4)                           |
| Patel et al., [102]       | 2021 | USA          | 5 | 19-37 | M (5)             | Pfizer (4); Moderna (1)     | Myocarditis/myopericarditis (5)                                      | Discharged (5)                           |
| Perna et al., [103]       | 2022 | Italy        | 1 | 30    | M (1)             | Unspecific mRNA vaccine (1) | Pericarditis (1)                                                     | Discharged (1)                           |

|                            |      |          |    |           |               |                                      |                                                              |                                   |
|----------------------------|------|----------|----|-----------|---------------|--------------------------------------|--------------------------------------------------------------|-----------------------------------|
| Puchalski et al., [104]    | 2022 | Poland   | 5  | 15-17     | M (5)         | Pfizer (5)                           | Myocarditis (5)                                              | Discharged (5)                    |
| Rosner et al., [105]       | 2021 | USA      | 6  | 19-39     | M (6)         | Pfizer (4); Moderna (1); Janssen (1) | Myocarditis (6)                                              | Discharged (1)                    |
| Sanci et al., [106]        | 2022 | Turkey   | 1  | 22        | F (1)         | Pfizer (1)                           | Type 1 Kounis syndrome (1)                                   | Discharged (1)                    |
| Sano et al., [107]         | 2022 | Japan    | 1  | 20        | M (1)         | Moderna (1)                          | Myocarditis (1)                                              | Discharged (1)                    |
| Schauer et al., [108]      | 2021 | USA      | 13 | age 12-17 | M (12); F (1) | Pfizer (13)                          | Myopericarditis (13)                                         | Discharged (13)                   |
| Schmitt et al., [109]      | 2021 | France   | 1  | 19        | M (1)         | Pfizer (1)                           | Myocarditis (1)                                              | Discharged (1)                    |
| Sciaccaluga et al., [110]  | 2022 | Italy    | 2  | 20-21     | M (2)         | Moderna (2)                          | Myopericarditis (2)                                          | Discharged (2)                    |
| Sharbatdaran et al., [111] | 2022 | Gredana  | 1  | 25        | M (1)         | Moderna (1)                          | Myopericarditis (1)                                          | Discharged (1)                    |
| Shiyovich et al., [112]    | 2022 | Israel   | 4  | 18-44     | M (3); F (1)  | Pfizer (4)                           | Myocarditis (4)                                              | Not described (4)                 |
| Shumkova et al., [113]     | 2021 | Bulgaria | 1  | 23        | M (1)         | Pfizer (1)                           | Myocarditis (1)                                              | Discharged (1)                    |
| Singh et al., [114]        | 2021 | USA      | 1  | 24        | M (1)         | Pfizer (1)                           | Myocarditis (1)                                              | Discharged (1)                    |
| Snapiri et al., [115]      | 2021 | Israel   | 7  | 16-17     | M (7)         | Pfizer (7)                           | Transient cardiac injury (7)                                 | Discharged (1)                    |
| Sokolska et al., [116]     | 2021 | Poland   | 1  | 21        | M (1)         | Pfizer (1)                           | Myocarditis (1)                                              | Not described (1)                 |
| Sonaglioni et al., [117]   | 2021 | Italy    | 1  | 54        | F (1)         | Pfizer (1)                           | Pericarditis (1)                                             | Not described (1)                 |
| Starekova et al., [118]    | 2021 | USA      | 5  | 17-38     | M (4); F (1)  | Pfizer (3); Moderna (2)              | Myocarditis (5)                                              | Not described (5)                 |
| Stewart et al., [119]      | 2022 | UK       | 1  | 50        | F (1)         | Astrazeneca (1)                      | Takotsubo Cardiomyopathy (1)                                 | Discharged (1)                    |
| Sulemankhil et al., [120]  | 2022 | USA      | 1  | 33        | M (1)         | Janssen (1)                          | Myocarditis (1)                                              | Discharged (1)                    |
| Sung et al., [121]         | 2021 | USA      | 2  | 42-68     | M (1); F (1)  | Moderna (2)                          | Myocardial Infarction (2)                                    | Discharged (2)                    |
| Tailor et al., [122]       | 2021 | USA      | 1  | 44        | M (1)         | Moderna (1)                          | Myocarditis (1)                                              | Discharged (1)                    |
| Tano et al., [123]         | 2021 | USA      | 6  | 15-17     | M (6)         | Pfizer (6)                           | Perimyocarditis (6)                                          | Discharged (5); Not described (1) |
| Tedeschi et al., [124]     | 2021 | Italy    | 1  | 17        | F (1)         | Pfizer (1)                           | Takotsubo syndrome (1)                                       | Discharged (1)                    |
| Tinoco et al., [125]       | 2021 | Portugal | 1  | 39        | M (1)         | Pfizer (1)                           | Perimyocarditis (1)                                          | Discharged (1)                    |
| Toida et al., [126]        | 2022 | Japan    | 1  | 80        | F (1)         | Pfizer (1)                           | Takotsubo syndrome (1)                                       | Discharged (1)                    |
| Ujueta et al., [127]       | 2021 | USA      | 1  | 62        | F (1)         | Janssen (1)                          | Myocarditis (1)                                              | Died (1)                          |
| Verma et al., [128]        | 2021 | USA      | 2  | 42-45     | M (1); F (1)  | Pfizer (2)                           | Myocarditis (2)                                              | Discharged (1); Died (1)          |
| Vidula et al., [129]       | 2021 | USA      | 5  | 18-60     | M (2); F (3)  | Pfizer (4); Moderna (1)              | Myocarditis (2); Pericarditis (2); Stress cardiomyopathy (1) | Discharged (3); Not described (2) |
| Watanabe et al., [130]     | 2022 | Japan    | 4  | 19-48     | M (4)         | Pfizer (1); Moderna (3)              | Myocarditis (4)                                              | Discharged (4)                    |
| Williams et al., [131]     | 2021 | Canada   | 1  | 34        | M (1)         | Moderna (1)                          | Myocarditis (1)                                              | Discharged (1)                    |
| Yamaura et al., [132]      | 2022 | Japan    | 1  | 30        | F (1)         | Pfizer (1)                           | Takotsubo cardiomyopathy (1)                                 | Discharged (1)                    |
| Yen et al., [133]          | 2022 | Taiwan   | 1  | 32        | M (1)         | Moderna (1)                          | Myocarditis (1)                                              | Discharged (1)                    |
| Zaki et al., [134]         | 2022 | Qatar    | 1  | 55        | M (1)         | Pfizer (1)                           | Pericarditis and pericardial effusion (1)                    | Discharged (1)                    |

Supplementary S4: Detailed description of studies reporting cases with neurological complications following COVID-19 vaccination (n = 245).

| Author                  | Year | Country      | Number of cases | Age range | Gender       | Vaccines                     | Diagnosis                                                                                                                                                                                                             | Outcome                                                  |
|-------------------------|------|--------------|-----------------|-----------|--------------|------------------------------|-----------------------------------------------------------------------------------------------------------------------------------------------------------------------------------------------------------------------|----------------------------------------------------------|
| Abicic et al., [1]      | 2021 | Croatia      | 1               | 24        | F (1)        | Pfizer (1)                   | Miller Fisher Syndrome (1)                                                                                                                                                                                            | Discharged (1)                                           |
| Ahmad et al., [2]       | 2021 | Iraq         | 1               | 62        | F (1)        | Pfizer (1)                   | Aseptic Meningitis (1)                                                                                                                                                                                                | Discharged (1)                                           |
| Alabkal et al., [3]     | 2021 | Canada       | 1               | 26        | F (1)        | Pfizer (1)                   | Incomplete Subacute Transverse Myelitis (1)                                                                                                                                                                           | Discharged (1)                                           |
| Aladdin et al.,[4]      | 2021 | Saudi Arabia | 1               | 42        | F (1)        | Astrazeneca (1)              | Refractory Status Epilepticus (1)                                                                                                                                                                                     | Discharged (1)                                           |
| Albokhari et al., [5]   | 2021 | Saudi Arabia | 1               | 16        | F (1)        | Pfizer (1)                   | Acute Inflammatory Transverse Myelitis (1)                                                                                                                                                                            | Discharged (1)                                           |
| Alhashim et al., [6]    | 2022 | Saudi Arabia | 1               | 28        | F (1)        | Pfizer (1)                   | Cerebral Venous Sinus Thrombosis (1)                                                                                                                                                                                  | Discharged (1)                                           |
| Allen et al., [7]       | 2021 | UK           | 4               | 20-57     | M (4)        | Astrazeneca (4)              | Guillain Barre Syndrome (4)                                                                                                                                                                                           | Not described (4)                                        |
| Al-Mashdali et al., [8] | 2021 | Qatar        | 1               | 32        | M (1)        | Moderna (1)                  | Acute Hyperactive Encephalopathy (1)                                                                                                                                                                                  | Discharged (1)                                           |
| Al-Mayhani et al.,[9]   | 2021 | UK           | 3               | 35-43     | M (1); F (2) | Astrazeneca (3)              | Ischaemic Stroke (3)                                                                                                                                                                                                  | Brainstem death (1); Recovering (1); Critically ill (1)  |
| Al-Midfai et al., [10]  | 2022 | USA          | 1               | 25        | F (1)        | Janssen (1)                  | Acute Multiple Sclerosis Exacerbation (1)                                                                                                                                                                             | Discharged (1)                                           |
| Al-Quliti et al., [11]  | 2022 | Saudi Arabia | 1               | 56        | F (1)        | Astrazeneca (1)              | Acute Demyelinating Encephalomyelitis (1)                                                                                                                                                                             | Discharged (1)                                           |
| Alsallamin et al., [12] | 2022 | USA          | 1               | 59        | M (1)        | Not described (1)            | Cerebral Vein Thrombosis (1)                                                                                                                                                                                          | Discharged (1)                                           |
| Alshararni et al., [13] | 2021 | Saudi Arabia | 1               | 38        | M (1)        | Pfizer (1)                   | Acute Transverse Myelitis (1)                                                                                                                                                                                         | Not described (1)                                        |
| Aly et al., [14]        | 2022 | Egypt        | 1               | 29        | M (1)        | Astrazeneca (1)              | Guillain Barre Syndrome (1)                                                                                                                                                                                           | Discharged (1)                                           |
| Amjad et al., [15]      | 2022 | USA          | 1               | 78        | M (1)        | Pfizer (1)                   | Parsonage Turner Syndrome (1)                                                                                                                                                                                         | Discharged (1)                                           |
| Anamnart et al., [16]   | 2022 | Thailand     | 2               | 26-46     | F (2)        | Astrazeneca (1); Sinovac (1) | Neuromyelitis Optica Spectrum Disorder (2)                                                                                                                                                                            | Not described (2)                                        |
| Ancau et al., [17]      | 2022 | Germany      | 3               | 25-61     | M (1); F (2) | Astrazeneca (3)              | Acute Hemorrhagic Encephalomyelitis (3)                                                                                                                                                                               | Discharged (2); Died (1)                                 |
| Andreozzi et al., [18]  | 2022 | Italy        | 2               | 43-59     | M (1); F (1) | Astrazeneca (2)              | Facial Palsy (2)                                                                                                                                                                                                      | Discharged (1); Not described (1)                        |
| Aravinda et al., [19]   | 2021 | India        | 1               | 73        | M (1)        | Astrazeneca (1)              | Guillain Barre Syndrome (1)                                                                                                                                                                                           | Discharged (1)                                           |
| Asif et al., [20]       | 2022 | USA          | 1               | 28        | M (1)        | Janssen (1)                  | Cerebral Venous Sinus Thrombosis (1)                                                                                                                                                                                  | Discharged (1)                                           |
| Assiri et al., [21]     | 2022 | Saudi Arabia | 18              | 23-80     | M (9); F (9) | Pfizer (8); Astrazeneca (10) | Optic neuritis (2); Cerebral Venous thrombosis (1); Cerebral Venous thrombosis and intracranial hemorrhage (2); Guillain Barre Syndrome (1); Ischemic Cerebrovascular accident (7); Ischemic Cerebrovascular accident | Discharged (12); Died (2); Admitted to extended care (4) |

|                          |      |           |   |       |              |                                                                       |                                                                                                                           |                                             |
|--------------------------|------|-----------|---|-------|--------------|-----------------------------------------------------------------------|---------------------------------------------------------------------------------------------------------------------------|---------------------------------------------|
|                          |      |           |   |       |              |                                                                       | and Vestibular neuritis (1); Miller Fisher Syndrome (1); Seizure (1); Seizure and encephalopathy (1); Ischemic Attack (1) |                                             |
| Azam et al., [22]        | 2021 | UK        | 1 | 67    | M (1)        | Astrazeneca (1)                                                       | Guillain Barre Syndrome (1)                                                                                               | Not described (1)                           |
| Bagella et al., [23]     | 2021 | Italy     | 1 | 49    | M (1)        | Astrazeneca (1)                                                       | Chronic Inflammatory Demyelinating Polyneuropathy (1)                                                                     | Not described (1)                           |
| Ballout et al., [24]     | 2022 | USA       | 4 | 27-81 | M (1); F (3) | Pfizer (2); Moderna (2)                                               | Neuromyelitis Optica Spectrum Disorder (2); Acute Disseminated Encephalomyelitis (1); Meningoencephalitis (1)             | Discharged (2); Died (1); Not described (1) |
| Balloy et al., [25]      | 2022 | France    | 1 | 63    | M (1)        | Astrazeneca (1)                                                       | Neuralgic amyotrophy (1)                                                                                                  | Discharged (1)                              |
| Bax et al., [26]         | 2021 | Italy     | 2 | 51-90 | M (1); F (1) | Unspecific Adenoviral vector vaccine (1); Unspecific mRNA vaccine (1) | Acute motor sensory axonal neuropathy (1); Acute Inflammatory demyelinating polyneuropathy (1)                            | Not described (2)                           |
| Bazrafshan et al., [27]  | 2022 | Iran      | 1 | 68    | F (1)        | Astrazeneca (1)                                                       | Guillain Barre Syndrome (1)                                                                                               | Discharged (1)                              |
| Bensaidane et al., [28]  | 2022 | Canada    | 1 | 56    | M (1)        | Astrazeneca (1)                                                       | Acute Necrotizing encephalopathy (1)                                                                                      | Discharged (1)                              |
| Berlot et al., [29]      | 2022 | Italy     | 1 | 69    | F (1)        | Astrazeneca (1)                                                       | Cerebral Venous Sinus Thrombosis (1)                                                                                      | Recovering (1)                              |
| Bernheimer et al., [30]  | 2022 | USA       | 1 | 42    | F (1)        | Moderna (1)                                                           | Parsonage Turner Syndrome (1)                                                                                             | Discharged (1)                              |
| Biswas et al., [31]      | 2021 | India     | 1 | 49    | M (1)        | Astrazeneca (1)                                                       | Guillain Barre Syndrome (1)                                                                                               | Discharged (1)                              |
| Bogs et al., [32]        | 2022 | Germany   | 1 | 15    | M (1)        | Pfizer (1)                                                            | Aseptic Meningitis (1)                                                                                                    | Discharged (1)                              |
| Bollo et al., [33]       | 2021 | Italy     | 1 | 42    | F (1)        | Moderna (1)                                                           | Guillain Barre Syndrome (1)                                                                                               | Discharged (1)                              |
| Bonifacio et al., [34]   | 2022 | UK        | 4 | 43-66 | M (4)        | Astrazeneca (4)                                                       | Guillain Barre Syndrome (4)                                                                                               | Recovering (4)                              |
| Borelli et al., [35]     | 2021 | Brazil    | 1 | 42    | M (1)        | Astrazeneca (1)                                                       | Optic Neuritis and Longitudinally Extensive Transverse Myelitis (1)                                                       | Discharged (1)                              |
| Bouattour et al., [36]   | 2022 | Tunisia   | 1 | 67    | M (1)        | Pfizer (1)                                                            | Guillain Barre Syndrome (1)                                                                                               | Discharged (1)                              |
| Bramer et al., [37]      | 2022 | UK        | 1 | 50    | F (1)        | Pfizer (1)                                                            | Vestibular Neuronitis (1)                                                                                                 | Discharged (1)                              |
| Burillo et al., [38]     | 2021 | Spain     | 1 | 38    | M (1)        | Astrazeneca (1)                                                       | Amyotrophic Neuralgia (1)                                                                                                 | Not described (1)                           |
| Burrows et al., [39]     | 2021 | UK        | 1 | 61    | M (1)        | Pfizer (1)                                                            | Bells Palsy (1)                                                                                                           | Discharged (1)                              |
| Butler et al., [40]      | 2021 | UK        | 2 | 36-38 | F (2)        | Pfizer (1); Moderna (1)                                               | Functional Neurological Disorders (2)                                                                                     | Discharged (1); Not described (1)           |
| Cabral et al., [41]      | 2022 | Portugal  | 1 | 33    | M (1)        | Pfizer (1)                                                            | Transverse Myelitis (1)                                                                                                   | Discharged (1)                              |
| Cao et al., [42]         | 2022 | China     | 1 | 24    | F (1)        | Sinopharm (1)                                                         | Acute Disseminated Encephalomyelitis (1)                                                                                  | Not described (1)                           |
| Carneiro et al., [43]    | 2022 | Portugal  | 1 | 62    | F (1)        | Pfizer (1)                                                            | Aseptic Meningitis (1)                                                                                                    | Discharged (1)                              |
| Carranza et al., [44]    | 2022 | USA       | 1 | 53    | F (1)        | Janssen (1)                                                           | Guillain Barre Syndrome (1)                                                                                               | Discharged (1)                              |
| Castan et al., [45]      | 2022 | France    | 1 | 57    | M (1)        | Janssen (1)                                                           | Ischemic Stroke (1)                                                                                                       | Discharged (1)                              |
| Castiglione et al., [46] | 2022 | Argentina | 9 | 39-87 | M (7); F (2) | Astrazeneca (4); Sputnik V (5)                                        | Guillain Barre Syndrome (9)                                                                                               | Recovering (8); Died (1)                    |
| Cellina et al., [47]     | 2022 | Italy     | 1 | 35    | F (1)        | Moderna (1)                                                           | Bells Palsy (1)                                                                                                           | Recovering (1)                              |
| Censcak et al., [48]     | 2021 | Czech     | 1 | 42    | M (1)        | Pfizer (1)                                                            | Guillain Barre Syndrome (1)                                                                                               | Not described (1)                           |
| Chakrabarti et al.,      | 2022 | India     | 1 | 60    | F (1)        | Astrazeneca (1)                                                       | Progressive dementia with asymmetric rigidity (1)                                                                         | Died (1)                                    |

|                           |      |                     |   |               |              |                                          |                                                                                                                                          |                                          |
|---------------------------|------|---------------------|---|---------------|--------------|------------------------------------------|------------------------------------------------------------------------------------------------------------------------------------------|------------------------------------------|
| [49]                      |      |                     |   |               |              |                                          |                                                                                                                                          |                                          |
| Chan et al., [50]         | 2022 | Singapore           | 2 | 38-43         | F (2)        | Pfizer (2)                               | Aseptic Meningitis (2)                                                                                                                   | Discharged (2)                           |
| Chaurasia et al., [51]    | 2022 | Nepal               | 1 | 65            | M (1)        | Astrazeneca (1)                          | Cognitive Deficit and Memory Impairments (1)                                                                                             | Discharged (1)                           |
| Chen et al., [52]         | 2021 | China               | 1 | Not described | F (1)        | Unspecific inactivated virus vaccine (1) | Neuromyelitis Optica Spectrum Disorder (1)                                                                                               | Not described (1)                        |
| Chua et al., [53]         | 2022 | USA                 | 1 | 64            | M (1)        | Moderna (1)                              | Parsonage Turner Syndrome (1)                                                                                                            | Recovering (1)                           |
| Chun et al., [54]         | 2022 | South Korea         | 2 | 76-80         | F (2)        | Pfizer (2)                               | Guillain Barre Syndrome (1); Acute Inflammatory Demyelinating Polyneuropathy (1)                                                         | Transferred to Rehabilitation centre (2) |
| Cicalese et al., [55]     | 2022 | Italy               | 1 | 88            | M (1)        | Moderna (1)                              | Third Cranial Nerve Palsy (1)                                                                                                            | Discharged (1)                           |
| Colella et al., [56]      | 2021 | Italy               | 1 | 37            | M (1)        | Pfizer (1)                               | Bells Palsy (1)                                                                                                                          | Discharged (1)                           |
| Consoli et al., [57]      | 2022 | Italy               | 1 | 37            | F (1)        | Pfizer (1)                               | Status Migrainosus (1)                                                                                                                   | Not described (1)                        |
| Correa et al., [58]       | 2021 | Brazil              | 3 | 42-65         | M (3)        | Astrazeneca (3)                          | Ischemic Stroke (1); Facial Nerve Palsy (1); Cervical Myelitis (1)                                                                       | Discharged (2); Not described (1)        |
| Costentin et al., [59]    | 2021 | France              | 1 | 26            | F (1)        | Astrazeneca (1)                          | Acute Ischemic Stroke (1)                                                                                                                | Not described (1)                        |
| Daher et al., [60]        | 2022 | Lebanon             | 1 | 46            | F (1)        | Unspecific mRNA vaccine (1)              | Unilateral Lower Limb Paralysis (1)                                                                                                      | Discharged (1)                           |
| Dalwadi et al., [61]      | 2021 | USA                 | 1 | 86            | F (1)        | Moderna (1)                              | Axonal variant Gullain-Barre syndrome (1)                                                                                                | Not described (1)                        |
| Dang et al., [62]         | 2021 | Australia           | 1 | 63            | M (1)        | Astrazeneca (1)                          | Miller Fisher Syndrome and Guillain Barre Syndrome (1)                                                                                   | Discharged (1)                           |
| Desai et al., [63]        | 2021 | USA                 | 1 | 69            | F (1)        | Moderna (1)                              | Myasthenia Gravis Exacerbation                                                                                                           | Recovering (1)                           |
| Diaz-Segarra et al., [64] | 2021 | USA                 | 1 | 35            | F (1)        | Pfizer (1)                               | Parsonage Turner Syndrome (1)                                                                                                            | Not described (1)                        |
| Doi et al., [65]          | 2022 | Japan               | 1 | 27            | F (1)        | Pfizer (1)                               | Cervical Transverse Myelitis (1)                                                                                                         | Discharged (1)                           |
| Einstein et al., [66]     | 2021 | USA                 | 1 | 58            | F (1)        | Not described (1)                        | Bells Palsy (1)                                                                                                                          | Not described (1)                        |
| Eom et al., [67]          | 2022 | South Korea         | 2 | 23-81         | M (1); F (1) | Pfizer (2)                               | Acute Transverse Myelitis (2)                                                                                                            | Discharged (2)                           |
| Erdem et al., [68]        | 2021 | Turkey              | 1 | 78            | F (1)        | Sinovac (1)                              | Acute Transverse Myelitis (1)                                                                                                            | Discharged (1)                           |
| Etemadifar et al., [69]   | 2021 | Iran                | 1 | 34            | F (1)        | Sputnik V (1)                            | Relapse of Multiple Sclerosis (1)                                                                                                        | Discharged (1)                           |
| Fan et al., [70]          | 2022 | Taiwan              | 1 | 22            | M (1)        | Moderna (1)                              | Encephalitis and Statis Epilepticus (1)                                                                                                  | Recovering (1)                           |
| Fernandes et al., [71]    | 2022 | Trinidad and Tobago | 4 | 16-61         | M (2); F (2) | Pfizer (2); Astrazeneca (2)              | New Onset Seizures (1); Longitudinally Extensive Transverse Myelitis (1); Guillain Barre Syndrome (1); Meningitis Retention Syndrome (1) | Discharged (1)                           |
| Finsterer et al., [72]    | 2021 | Austria             | 1 | 32            | M (1)        | Unspecific Vector-based vaccine          | Guillain Barre Syndrome (1)                                                                                                              | Recovering (1)                           |
| Franco et al., [73]       | 2022 | Spain               | 2 | 53-65         | M (2)        | Pfizer (2)                               | Ischemic Optic Neuropathy (2)                                                                                                            | Discharged (2)                           |
| Fujimori et al., [74]     | 2021 | Japan               | 1 | 40            | F (1)        | Pfizer (1)                               | Multiple Sclerosis (1)                                                                                                                   | Not described (1)                        |
| Fukushima et al., [75]    | 2022 | Japan               | 1 | 55            | F (1)        | Pfizer (1)                               | Sensory Ataxic subtype of Guillain Barre Syndrome (1)                                                                                    | Transferred to Rehabilitation centre (1) |
| Galvez et al., [76]       | 2021 | Colombia            | 1 | 73            | M (1)        | Sinovac (1)                              | Guillain Barre Syndrome (1)                                                                                                              | Discharged (1)                           |
| Gama et al., [77]         | 2022 | Brazil              | 1 | 47            | F (1)        | Astrazeneca (1)                          | Longitudinal Extensive Transverse Myelitis (1)                                                                                           | Discharged (1)                           |

|                              |      |                     |   |             |              |                                               |                                                                                                   |                                             |
|------------------------------|------|---------------------|---|-------------|--------------|-----------------------------------------------|---------------------------------------------------------------------------------------------------|---------------------------------------------|
| Gao et al., (a)[78]          | 2021 | Taiwan              | 1 | 76          | F (1)        | Moderna (1)                                   | Acute Transverse Myelitis (1)                                                                     | Discharged (1)                              |
| Gao et al., (b)[79]          | 2022 | Taiwan              | 1 | 82          | F (1)        | Moderna (1)                                   | Acute Encephalitis (1)                                                                            | Discharged (1)                              |
| Garcia-Grimshaw et al., [80] | 2021 | Mexico              | 6 | 25-81       | M (4); F (2) | Pfizer (6)                                    | Guillain Barre Syndrome (6)                                                                       | Discharged (5); Died (1)                    |
| Garg et al., [81]            | 2022 | India               | 1 | 56          | F (1)        | Astrazeneca (1)                               | Tumefactive Demyelinating Brain Lesion (1)                                                        | Discharged (1)                              |
| George et al., [82]          | 2022 | USA                 | 1 | 60          | M (1)        | Moderna (1)                                   | Guillain Barre Syndrome (1)                                                                       | Discharged (1)                              |
| Ghosh et al., [83]           | 2021 | India               | 1 | 68          | M (1)        | Astrazeneca (1)                               | Focal non-motor onset seizure with impaired awareness (1)                                         | Discharged (1)                              |
| Grenacher et al., [84]       | 2021 | Germany and Austria | 9 | Unknown (9) | Unknown (9)  | Astrazeneca (9)                               | Cerebral Venous Thrombosis (9)                                                                    | Died (5); Recovering (3); Not described (1) |
| Guarnaccia et al., [85]      | 2022 | USA                 | 1 | 32          | F (1)        | Pfizer (1)                                    | Incomplete transverse myelitis secondary to multiple sclerosis (1)                                | Recovering (1)                              |
| Guditi et al., [86]          | 2021 | India               | 1 | 18          | F (1)        | Astrazeneca (1)                               | Cerebral Thrombotic Thrombocytopenia (1)                                                          | Died (1)                                    |
| Hasan et al., [87]           | 2021 | UK                  | 1 | 62          | F (1)        | Astrazeneca (1)                               | Guillain Barre Syndrome (1)                                                                       | Critically ill (1)                          |
| Havla et al., [88]           | 2022 | Germany             | 1 | 28          | F (1)        | Pfizer (1)                                    | Multiple Sclerosis (1)                                                                            | Recovering (1)                              |
| Hemalatha et al., [89]       | 2021 | India               | 1 | 43          | F (1)        | Astrazeneca (1)                               | Guillain Barre Syndrome (1)                                                                       | Transferred to Rehabilitation centre (1)    |
| Hirose et al., [90]          | 2021 | Japan               | 1 | 70          | M (1)        | Moderna (1)                                   | Acute Autoimmune Transverse Myelitis (1)                                                          | Discharged (1)                              |
| Hsiao et al., [91]           | 2021 | Taiwan              | 1 | 41          | M (1)        | Astrazeneca (1)                               | Acute Transverse Myelitis (1)                                                                     | Discharged (1)                              |
| Hughes et al., [92]          | 2021 | USA                 | 1 | 65          | M (1)        | Pfizer (1)                                    | Guillain Barre Syndrome (1)                                                                       | Discharged (1)                              |
| Ifthikhar et al., [93]       | 2021 | Qatar               | 1 | 36          | M (1)        | Moderna (1)                                   | Bells Palsy (1)                                                                                   | Discharged (1)                              |
| Introna et al., [94]         | 2021 | Italy               | 1 | 62          | M (1)        | Astrazeneca (1)                               | Guillain Barre Syndrome (1)                                                                       | Recovering (1)                              |
| Ish et al., [95]             | 2021 | India               | 1 | 50          | M (1)        | Covaxin (1)                                   | Facial Nerve Palsy (1)                                                                            | Discharged (1)                              |
| James et al., [96]           | 2021 | India               | 3 | 54-66       | M (2); F (1) | Astrazeneca (3)                               | Guillain Barre Syndrome (3)                                                                       | Discharged (1); Not described (2)           |
| John et al., [97]            | 2021 | India               | 1 | 55          | F (1)        | Astrazeneca (1)                               | Guillain Barre Syndrome (1)                                                                       | Discharged (1)                              |
| Kanabar et al., [98]         | 2021 | UK                  | 2 | 56-61       | M (1); F (1) | Astrazeneca (2)                               | Guillain Barre Syndrome (2)                                                                       | Recovering (2)                              |
| Kang et al., [99]            | 2022 | South Korea         | 1 | 32          | M (1)        | Pfizer (1)                                    | Aseptic Meningitis (1)                                                                            | Discharged (1)                              |
| Kania et al., [100]          | 2021 | Poland              | 1 | 19          | F (1)        | Moderna (1)                                   | Acute Disseminated Encephalomyelitis (1)                                                          | Discharged (1)                              |
| Karimi et al., [101]         | 2021 | Iran                | 8 | 26-87       | M (6); F (2) | Astrazeneca (1); Sinopharm (3); Sputnik V (4) | Guillain Barre Syndrome (6); Acute Motor Axonal Neuropathy subtype of Guillain Barre Syndrome (2) | Discharged (7); Recovering (1)              |
| Katada et al., [102]         | 2022 | Japan               | 1 | 44          | F (1)        | Pfizer (1)                                    | Chronic Inflammatory Demyelinating Polyneuropathy (1)                                             | Not described (1)                           |
| Kataria et al., [103]        | 2022 | USA                 | 1 | 57          | F (1)        | Pfizer (1)                                    | Relapse of Multiple Sclerosis (1)                                                                 | Discharged (1)                              |
| Kavya et al., [104]          | 2021 | India               | 1 | 19          | M (1)        | Astrazeneca (1)                               | Acute Disseminated Encephalomyelitis (1)                                                          | Discharged (1)                              |
| Kawtharani et al., [105]     | 2021 | Lebanon             | 1 | 37          | F (1)        | Astrazeneca (1)                               | Longitudinal Extensive Transverse Myelitis (1)                                                    | Discharged (1)                              |
| Kaya et al., [106]           | 2022 | Turkey              | 1 | 45          | F (1)        | Pfizer (1)                                    | Trigeminal Neuralgia (1)                                                                          | Discharged (1)                              |
| Keir et al., [107]           | 2021 | USA                 | 1 | 57          | F (1)        | Pfizer (1)                                    | Neurologic Phantasmia (1)                                                                         | Not described (1)                           |
| Kenda et al., [108]          | 2021 | Slovenia            | 1 | 51          | F (1)        | Astrazeneca (1)                               | Acute Ischemic Stroke (1)                                                                         | Discharged (1)                              |

|                            |      |             |    |       |              |                             |                                                                                                                                                                                                                                            |                                          |
|----------------------------|------|-------------|----|-------|--------------|-----------------------------|--------------------------------------------------------------------------------------------------------------------------------------------------------------------------------------------------------------------------------------------|------------------------------------------|
| Khadka et al., [109]       | 2021 | Nepal       | 1  | 44    | M (1)        | Janssen (1)                 | Acute Inflammatory Demyelinating Polyneuropathy (1)                                                                                                                                                                                        | Discharged (1)                           |
| Khajavirad et al., [110]   | 2022 | Iran        | 2  | 56-70 | F (2)        | Astrazeneca (2)             | Encephalopathy (1); Cerebral Venous Sinus Thrombosis (1)                                                                                                                                                                                   | Discharged (2)                           |
| Khan et al., [111]         | 2022 | India       | 1  | 67    | F (1)        | Moderna (1)                 | Acute Transverse Myelitis (1)                                                                                                                                                                                                              | Discharged (1)                           |
| Khayat-Khoei et al., [112] | 2022 | USA         | 7  | 24-64 | M (2); F (5) | Pfizer (4); Moderna (3)     | Multiple sclerosis exacerbation (3); Relapsing-remitting Multiple sclerosis (3); Neuromyelitis Optica (1)                                                                                                                                  | Discharged (4); Not described (3)        |
| Kilic et al., [113]        | 2021 | Turkey      | 1  | 34    | M (1)        | Pfizer (1)                  | New Onset Refractory Status Epilepticus (1)                                                                                                                                                                                                | Discharged (1)                           |
| Kim JE et al., (b)[114]    | 2022 | South Korea | 13 | 18-84 | M (4); F (9) | Pfizer (5); Astrazeneca (8) | Guillain Barre Syndrome (5); Paraparetic Guillain Barre Syndrome (2); Acute Motor Axonal Neuropathy subtype of Guillain Barre Syndrome (3); Acute Inflammatory Demyelinating Polyradiculoneuropathy subtype of Guillain-Barre syndrome (3) | Discharged (13)                          |
| Kim JW et al., (c.)[115]   | 2022 | South Korea | 2  | 42-48 | M (1); F (1) | Pfizer (1); Astrazeneca (1) | Guillain Barre Syndrome (2)                                                                                                                                                                                                                | Discharged (2)                           |
| Kim NK et al., (d)[116]    | 2022 | South Korea | 1  | 21    | M (1)        | Pfizer (1)                  | Guillain Barre Syndrome (1)                                                                                                                                                                                                                | Discharged (1)                           |
| Kim SI et al., (a)[117]    | 2021 | South Korea | 1  | 45    | F (1)        | Astrazeneca (1)             | Leg paralysis Neuralgic Amyotrophy (1)                                                                                                                                                                                                     | Discharged (1)                           |
| Kim YS et al., (e.)[118]   | 2022 | USA         | 1  | 16    | F (1)        | Pfizer (1)                  | Sensory Predominant Guillain Barre Syndrome (1)                                                                                                                                                                                            | Discharged (1)                           |
| Kobayashi et al., [119]    | 2022 | Japan       | 1  | 46    | F (1)        | Pfizer (1)                  | Encephalitis (1)                                                                                                                                                                                                                           | Discharged (1)                           |
| Koh et al., [120]          | 2021 | Singapore   | 3  | 44-58 | M (3)        | Pfizer (2); Moderna (1)     | Neuralgic Amyotrophy (3)                                                                                                                                                                                                                   | Discharged (3)                           |
| Kotal et al., [121]        | 2021 | India       | 1  | 32    | F (1)        | Astrazeneca (1)             | Cerebral Sinus Venous Thrombosis (1)                                                                                                                                                                                                       | Discharged (1)                           |
| Kripalani et al.,[122]     | 2021 | India       | 1  | 52    | F (1)        | Astrazeneca (1)             | Guillain Barre Syndrome (1)                                                                                                                                                                                                                | Transferred to Rehabilitation Centre (1) |
| Kubota et al., [123]       | 2022 | Japan       | 1  | 65    | M (1)        | Pfizer (1)                  | Oculomotor Nerve Palsy (1)                                                                                                                                                                                                                 | Discharged (1)                           |
| Kwon et al., [124]         | 2022 | South Korea | 1  | 57    | F (1)        | Astrazeneca (1)             | Autoimmune Encephalitis (1)                                                                                                                                                                                                                | Recovering (1)                           |
| Kyle et al., [125]         | 2022 | USA         | 1  | 80    | F (1)        | Pfizer (1)                  | Encephalomyelitis (1)                                                                                                                                                                                                                      | Died (1)                                 |
| Lagosz et al., [126]       | 2022 | Poland      | 1  | 64    | M (1)        | Not described (1)           | Relapse of Multiple Sclerosis (1)                                                                                                                                                                                                          | Recovering (1)                           |
| Lee et al., [127]          | 2022 | South Korea | 1  | 61    | M (1)        | Astrazeneca (1)             | Guillain Barre Syndrome (1)                                                                                                                                                                                                                | Recovering (1)                           |
| Leemans et al., [128]      | 2022 | Belgium     | 8  | 57-81 | M (6); F (2) | Pfizer (6); Astrazeneca (2) | Guillain Barre Syndrome (3); Right lower trunk Branchial Plexopathy (1); Axonal sensorimotor polyneuropathy (1); Acute Inflammatory Demyelinating Polyneuropathy (1); Chronic Inflammatory Demyelinating Polyradiculoneuropathy (2)        | Discharged (7); Recovering (1)           |
| Ling et al., [129]         | 2021 | Canada      | 1  | 63    | M (1)        | Astrazeneca (1)             | Relapse of Guillain Barre Syndrome (1)                                                                                                                                                                                                     | Recovering (1)                           |
| Liu et al., [130]          | 2021 | USA         | 2  | 73-86 | M (1); F (1) | Moderna (2)                 | Encephalopathy associated with Non-convulsive focal epilepticus (2)                                                                                                                                                                        | Discharged (2)                           |
| Lohmann et al., [131]      | 2022 | Germany     | 1  | 68    | F (1)        | Pfizer (1)                  | AQP4-antibody positive neuromyelitis optica spectrum disorder (1)                                                                                                                                                                          | Discharged (1)                           |

|                               |      |             |   |               |              |                 |                                                                                                                                            |                                          |
|-------------------------------|------|-------------|---|---------------|--------------|-----------------|--------------------------------------------------------------------------------------------------------------------------------------------|------------------------------------------|
| Luca et al., [132]            | 2022 | Italy       | 1 | 82            | F (1)        | Pfizer (1)      | Chronic Inflammatory Axonal Polyneuropathy (1)                                                                                             | Transferred to Rehabilitation Centre (1) |
| Luciano et al., [133]         | 2022 | Brazil      | 1 | 66            | F (1)        | Astrazeneca (1) | Cerebral Thrombosis (1)                                                                                                                    | Died (1)                                 |
| Luitel et al., [134]          | 2022 | Nepal       | 1 | 48            | M (1)        | Astrazeneca (1) | Guillain Barre Syndrome (1)                                                                                                                | Discharged (1)                           |
| Mahajan et al., [135]         | 2021 | USA         | 1 | 50            | M (1)        | Pfizer (1)      | Parsonage Turner Syndrome (1)                                                                                                              | Recovering (1)                           |
| Malhotra et al., [136]        | 2021 | India       | 1 | 36            | M (1)        | Astrazeneca (1) | Myelitis (1)                                                                                                                               | Discharged (1)                           |
| Malik et al., [137]           | 2021 | USA         | 1 | 43            | F (1)        | Janssen (1)     | Transient Ischaemic Attack (1)                                                                                                             | Discharged (1)                           |
| Mancuso et al., [138]         | 2022 | Italy       | 1 | 42            | F (1)        | Astrazeneca (1) | Arterial Intracranial Thrombosis (1)                                                                                                       | Transferred to Rehabilitation Centre (1) |
| Manea et al., [139]           | 2022 | Romania     | 1 | 29            | M (1)        | Pfizer (1)      | Multiple Cranial Nerve Palsies (1)                                                                                                         | Discharged (1)                           |
| Maniscalco et al., [140]      | 2021 | Italy       | 1 | 26            | F (1)        | Pfizer (1)      | Acute Relapse Multiple Sclerosis (1)                                                                                                       | Discharged (1)                           |
| Maramattom et al., (a) [141]  | 2022 | India       | 5 | 42-65         | M (4); F (1) | Astrazeneca (5) | Acute Disseminated Encephalomyelitis (2); Tumefactive Demyelination (1); Limbic Encephalitis (1); Opsoclonus myoclonus ataxia syndrome (1) | Discharged (1); Recovering (4)           |
| Maramattom et al., (b) [142]  | 2021 | India       | 1 | 44            | F (1)        | Astrazeneca (1) | Cerebral Venous Sinus Thrombosis (1)                                                                                                       | Discharged (1)                           |
| Maramattom et al., (c) [143]  | 2021 | India       | 7 | 43-70         | M (1); F (6) | Astrazeneca (7) | Guillain Barre Syndrome (7)                                                                                                                | Recovering (7)                           |
| Maroufi et al., [144]         | 2022 | Iran        | 1 | 31            | F (1)        | Astrazeneca (1) | Longitudinal Extensive Transverse Myelitis (1)                                                                                             | Discharged (1)                           |
| Martin-Villares et al., [145] | 2022 | Spain       | 1 | 34            | F (1)        | Moderna (1)     | Bells Palsy (1)                                                                                                                            | Discharged (1)                           |
| Masuccio et al., [146]        | 2021 | Italy       | 1 | Not described | M (1)        | Moderna (1)     | Guillain Barre Syndrome (1)                                                                                                                | Recovering (1)                           |
| Materneh et al., [147]        | 2021 | Qatar       | 1 | 61            | M (1)        | Moderna (1)     | Guillain Barre Syndrome (1)                                                                                                                | Discharged (1)                           |
| Mazzeo et al., [148]          | 2021 | Italy       | 2 | 45-55         | M (1); F (1) | Astrazeneca (2) | Cerebral Venous Sinus Thrombosis (2)                                                                                                       | Died (2)                                 |
| McKean et al., [149]          | 2021 | Malta       | 1 | 48            | M (1)        | Astrazeneca (1) | Guillain Barre Syndrome (1)                                                                                                                | Discharged (1)                           |
| Mehta et al., [150]           | 2021 | UK          | 2 | 25-32         | M (2)        | Astrazeneca (2) | Cerebral Venous Sinus Thrombosis (2)                                                                                                       | Not described (2)                        |
| Melo-Silva et al., [151]      | 2021 | Brazil      | 1 | 57            | F (1)        | Astrazeneca (1) | Large Hemorrhagic Stroke (1)                                                                                                               | Recovering (1)                           |
| Michele et al., [152]         | 2022 | Italy       | 2 | 55-57         | F (2)        | Astrazeneca (2) | Cerebral Infarction (2)                                                                                                                    | Recovering (1); Brain death (1)          |
| Min et al., [153]             | 2021 | South Korea | 2 | 37-58         | M (1); F (1) | Astrazeneca (2) | Guillain Barre Syndrome (2)                                                                                                                | Not described (2)                        |
| Mirmosayyed et al., [154]     | 2022 | Iran        | 2 | 27-58         | M (1); F (1) | Sputnik V (2)   | Bells Palsy (2)                                                                                                                            | Discharged (1); Recovering (1)           |
| Miyamoto et al., [155]        | 2022 | Japan       | 1 | 54            | F (1)        | Pfizer (1)      | Acute Disseminated Encephalomyelitis (1)                                                                                                   | Transferred to Rehabilitation Centre (1) |
| Miyaue et al., [156]          | 2022 | Japan       | 1 | 75            | M (1)        | Pfizer (1)      | Refractory Longitudinally Extensive Transverse Myelitis (1)                                                                                | Transferred to Rehabilitation            |

|                          |      |              |    |       |               |                                           |                                                                                                                                                                                                                                                                                                                                                                                                                                                                                                                                                                                                                                                                                                                                                 |                                                          |
|--------------------------|------|--------------|----|-------|---------------|-------------------------------------------|-------------------------------------------------------------------------------------------------------------------------------------------------------------------------------------------------------------------------------------------------------------------------------------------------------------------------------------------------------------------------------------------------------------------------------------------------------------------------------------------------------------------------------------------------------------------------------------------------------------------------------------------------------------------------------------------------------------------------------------------------|----------------------------------------------------------|
|                          |      |              |    |       |               |                                           |                                                                                                                                                                                                                                                                                                                                                                                                                                                                                                                                                                                                                                                                                                                                                 | Centre (1)                                               |
| Morehouse et al., [157]  | 2021 | USA          | 1  | 49    | F (1)         | Janssen (1)                               | Guillain Barre Syndrome (1)                                                                                                                                                                                                                                                                                                                                                                                                                                                                                                                                                                                                                                                                                                                     | Discharged (1)                                           |
| Muir et al., [158]       | 2021 | USA          | 1  | 48    | F (1)         | Janssen (1)                               | Cerebral Venous Thrombosis (1)                                                                                                                                                                                                                                                                                                                                                                                                                                                                                                                                                                                                                                                                                                                  | Critically ill (1)                                       |
| Mumoli et al., [159]     | 2022 | Italy        | 1  | 45    | M (1)         | Astrazeneca (1)                           | Acute Disseminated Encephalomyelitis anti-MOG antibody                                                                                                                                                                                                                                                                                                                                                                                                                                                                                                                                                                                                                                                                                          | Discharged (1)                                           |
| Mussatto et al., [160]   | 2022 | USA          | 1  | 60    | M (1)         | Pfizer (1)                                | Bells Palsy (1)                                                                                                                                                                                                                                                                                                                                                                                                                                                                                                                                                                                                                                                                                                                                 | Discharged (1)                                           |
| Nagalli et al., [161]    | 2022 | USA          | 1  | 49    | F (1)         | Moderna (1)                               | Guillain Barre Syndrome (1)                                                                                                                                                                                                                                                                                                                                                                                                                                                                                                                                                                                                                                                                                                                     | Discharged (1)                                           |
| Nagaratnam et al., [162] | 2022 | Australia    | 1  | 36    | F (1)         | Astrazeneca (1)                           | Acute Disseminated Encephalomyelitis (1)                                                                                                                                                                                                                                                                                                                                                                                                                                                                                                                                                                                                                                                                                                        | Discharged (1)                                           |
| Nasiri et al., [163]     | 2022 | Saudi Arabia | 2  | 27-33 | M (2)         | Pfizer (2)                                | Guillain Barre Syndrome (2)                                                                                                                                                                                                                                                                                                                                                                                                                                                                                                                                                                                                                                                                                                                     | Discharged (1); Recovering (1)                           |
| Nasuelli et al., [164]   | 2021 | Italy        | 1  | 59    | M (1)         | Astrazeneca (1)                           | Guillain Barre Syndrome (1)                                                                                                                                                                                                                                                                                                                                                                                                                                                                                                                                                                                                                                                                                                                     | Recovering (1)                                           |
| Nawaz et al., [165]      | 2022 | UK           | 1  | 47    | M (1)         | Not described (1)                         | Parsonage Turner Syndrome (1)                                                                                                                                                                                                                                                                                                                                                                                                                                                                                                                                                                                                                                                                                                                   | Discharged (1)                                           |
| Netravathi et al., [166] | 2022 | India        | 29 | 20-65 | M (12); F(17) | Astrazeneca (27); Covaxin (2)             | Acute Demyelinating Encephalomyelitis (3); Acute Transverse Myelitis (3); Longitudinally extensive transverse myelitis (2); Cervical Cord Demyelination (1); Tumefactive Demyelination (1); Area Postrema Syndrome - Aquaporin 4 positive NMO (1); Bilateral Optic Neuritis (1); Brainstem syndrome (1); Central Nervous System Demyelinating (2); Cervical Cord Myelopathy (1); Cervical Myelopathy - Multiple Sclerosis (1); Longitudinal Extensive Transverse Myelitis - Aquaporin 4 positive neuromyelitis optica (1); MOG associated Acute Disseminated Encephalomyelitis (3); MOG associated Longitudinally Extensive Transverse Myelitis (2); MOG associated Optic Neuritis (4); MOG associated Opticomyelopathy (1); Optic Neuritis (1) | Recovering (29)                                          |
| Nishiguchi et al., [167] | 2021 | Japan        | 1  | 71    | M (1)         | Pfizer (1)                                | Miller Fisher Syndrome (1)                                                                                                                                                                                                                                                                                                                                                                                                                                                                                                                                                                                                                                                                                                                      | Discharged (1)                                           |
| Nishizawa et al., [168]  | 2021 | Japan        | 1  | 62    | F (1)         | Janssen (1)                               | Bells Palsy (1)                                                                                                                                                                                                                                                                                                                                                                                                                                                                                                                                                                                                                                                                                                                                 | Not described (1)                                        |
| Nistri et al., [169]     | 2021 | Italy        | 16 | 30-66 | M (4); F (12) | Pfizer (10); Astrazeneca (4); Moderna (2) | Multiple Sclerosis (3); Recurrent Multiple Sclerosis (13)                                                                                                                                                                                                                                                                                                                                                                                                                                                                                                                                                                                                                                                                                       | Discharged (3); Recovering (8); Not described (5)        |
| Ogbebor et al., [170]    | 2021 | USA          | 1  | 86    | F (1)         | Pfizer (1)                                | Guillain Barre Syndrome (1)                                                                                                                                                                                                                                                                                                                                                                                                                                                                                                                                                                                                                                                                                                                     | Discharged (1)                                           |
| Onoda et al., [171]      | 2022 | Japan        | 1  | 77    | F (1)         | Pfizer (1)                                | Trigeminal Neuropathy (1)                                                                                                                                                                                                                                                                                                                                                                                                                                                                                                                                                                                                                                                                                                                       | Discharged (1)                                           |
| Oo et al., [172]         | 2021 | Australia    | 4  | 51-72 | M (3); F (1)  | Astrazeneca (4)                           | Gullain Barre Syndrome (3); Chronic Inflammatory Demyelinating Polyradiculoneuropathy (1)                                                                                                                                                                                                                                                                                                                                                                                                                                                                                                                                                                                                                                                       | Transferred to Rehabilitation centre (3); Recovering (1) |
| Oshida et al., [173]     | 2022 | Japan        | 3  | 44-75 | F (3)         | Pfizer (3)                                | Aneurysmal Subarachnoid Hemorrhage (3)                                                                                                                                                                                                                                                                                                                                                                                                                                                                                                                                                                                                                                                                                                          | Discharged (1); Transferred to Rehabilitation Centre (2) |
| Ozgen et al., [174]      | 2021 | Turkey       | 1  | 46    | F (1)         | Sinovac (1)                               | Acute Disseminated Encephalomyelitis (1)                                                                                                                                                                                                                                                                                                                                                                                                                                                                                                                                                                                                                                                                                                        | Discharged (1)                                           |
| Pagenkopf et al., [175]  | 2021 | Germany      | 1  | 45    | M (1)         | Astrazeneca (1)                           | Longitudinal Extensive Transverse Myelitis (1)                                                                                                                                                                                                                                                                                                                                                                                                                                                                                                                                                                                                                                                                                                  | Discharged (1)                                           |
| Pandey et al., [176]     | 2022 | India        | 1  | 60    | F (1)         | Astrazeneca (1)                           | Intracerebral hemorrhage (1)                                                                                                                                                                                                                                                                                                                                                                                                                                                                                                                                                                                                                                                                                                                    | Discharged (1)                                           |

|                                  |      |           |   |       |              |                         |                                                                                              |                                          |
|----------------------------------|------|-----------|---|-------|--------------|-------------------------|----------------------------------------------------------------------------------------------|------------------------------------------|
| Pang et al., [177]               | 2022 | Australia | 1 | 51    | F (1)        | Astrazeneca (1)         | Cerebral Venous Sinus Thrombosis (1)                                                         | Discharged (1)                           |
| Patel et al., [178]              | 2021 | UK        | 1 | 37    | M (1)        | Astrazeneca (1)         | Guillain Barre Syndrome (1)                                                                  | Recovering (1)                           |
| Permezel et al., [179]           | 2021 | Australia | 1 | 63    | M (1)        | Astrazeneca (1)         | Acute Disseminated Encephalomyelitis (1)                                                     | Died (1)                                 |
| Pothiawala et al., [180]         | 2021 | Singapore | 1 | 46    | M (1)        | Moderna (1)             | Bells Palsy (1)                                                                              | Discharged (1)                           |
| Poudel et al., [181]             | 2022 | Nepal     | 1 | 17    | F (1)        | Moderna (1)             | Bells Palsy (1)                                                                              | Discharged (1)                           |
| Prasad et al., [182]             | 2021 | USA       | 1 | 41    | M (1)        | Janssen (1)             | Bifacial Diplegia variant of Guillain Barre Syndrome (1)                                     | Transferred to Rehabilitation Centre (1) |
| Quelet et al., [183]             | 2022 | USA       | 2 | 44-49 | M (2)        | Pfizer (1); Moderna (1) | Parsonage Turner Syndrome (2)                                                                | Discharged (2)                           |
| Quintanilla-Bordas et al., [184] | 2022 | Spain     | 3 | 16-41 | F (3)        | Pfizer (1); Moderna (2) | Multiple Sclerosis (3)                                                                       | Recovering (3)                           |
| Rao et al., [185]                | 2021 | USA       | 1 | 42    | F (1)        | Pfizer (1)              | Guillain Barre Syndrome (1)                                                                  | Discharged (1)                           |
| Rastogi et al., [186]            | 2022 | Canada    | 1 | 59    | F (1)        | Moderna (1)             | Encephalitis (1)                                                                             | Discharged (1)                           |
| Razok et al., [187]              | 2021 | Qatar     | 1 | 73    | M (1)        | Pfizer (1)              | Guillain Barre Syndrome (1)                                                                  | Discharged (1)                           |
| Repajic et al., [188]            | 2021 | USA       | 1 | 57    | F (1)        | Pfizer (1)              | Recurrent Bells Palsy (1)                                                                    | Recovering (1)                           |
| Reyes-Capo et al., [189]         | 2021 | USA       | 1 | 59    | F (1)        | Pfizer (1)              | Acute Abducens Nerve Palsy (1)                                                               | Not described (1)                        |
| Rinaldi et al., [190]            | 2021 | Italy     | 1 | 45    | M (1)        | Astrazeneca (1)         | Acute Disseminated Encephalomyelitis (1)                                                     | Discharged (1)                           |
| Rizvi et al., [191]              | 2022 | India     | 1 | 28    | F (1)        | Astrazeneca (1)         | Acute Hemorrhagic Leukoencephalitis (1)                                                      | Discharged (1)                           |
| Rizzo et al., [192]              | 2022 | Italy     | 1 | 58    | F (1)        | Janssen (1)             | Ischemic Stroke (1)                                                                          | Recovering (1)                           |
| Roncati et al., [193]            | 2022 | Italy     | 1 | 28    | M (1)        | Moderna (1)             | Cubital Tunnel Syndrome (1)                                                                  | Recovering (1)                           |
| Rossetti et al., [194]           | 2021 | USA       | 1 | 38    | M (1)        | Janssen (1)             | Facial Diplegia Subtype of Guillain Barre Syndrome (1)                                       | Discharged (1)                           |
| Saito et al., [195]              | 2021 | Japan     | 1 | 42    | F (1)        | Pfizer (1)              | Aseptic Meningitis (1)                                                                       | Discharged (1)                           |
| Salbas et al., [196]             | 2021 | Turkey    | 2 | 33-49 | M (1); F (1) | Pfizer (2)              | Facial Paralysis (2)                                                                         | Discharged (2)                           |
| Saleh et al., [197]              | 2022 | Germany   | 1 | 42    | F (1)        | Astrazeneca (1)         | Vaccine Induced Immune Thrombotic Thrombocytopenia with Cerebral Venous Sinus Thrombosis (1) | Discharged (1)                           |
| Sanjay et al., [198]             | 2022 | India     | 1 | 50    | F (1)        | Pfizer (1)              | Non-Artheritic Anterior Ischaemic Optic Neuropathy (1)                                       | Discharged (1)                           |
| Sansen et al., [199]             | 2021 | Belgium   | 1 | 65    | M (1)        | Pfizer (1)              | Miller Fisher Syndrome (1)                                                                   | Recovering (1)                           |
| Saraswat et al., [200]           | 2021 | India     | 1 | 29    | M (1)        | Astrazeneca (1)         | Guillain Barre Syndrome (1)                                                                  | Discharged (1)                           |
| Scendoni et al., [201]           | 2021 | Italy     | 1 | 82    | F (1)        | Pfizer (1)              | Guillain Barre Syndrome (1)                                                                  | Transferred to Rehabilitation Centre (1) |
| Schultz et al., [202]            | 2021 | Norway    | 4 | 37-54 | F (4)        | Astrazeneca (4)         | Cerebellar Hemorrhagic Infarction (2); Cerebral Hemorrhage (1); Cerebral Vein Thrombosis (1) | Discharged (1); Died (3)                 |
| Senda et al., [203]              | 2022 | Japan     | 1 | 72    | F (1)        | Pfizer (1)              | Acute Meningoencephalitis (1)                                                                | Discharged (1)                           |
| Sepahvand et al., [204]          | 2022 | Iran      | 1 | 71    | M (1)        | Sinopharm (1)           | Cervical Longitudinally Extensive Myelitis (1)                                               | Recovering (1)                           |
| Shalilhamadi et al., [205]       | 2021 | Iran      | 1 | 29    | F (1)        | Sputnik V (1)           | Acute Disseminated Encephalomyelitis (1)                                                     | Recovering (1)                           |

|                             |      |              |   |       |              |                                      |                                                                      |                                                             |
|-----------------------------|------|--------------|---|-------|--------------|--------------------------------------|----------------------------------------------------------------------|-------------------------------------------------------------|
| Sharma et al., [206]        | 2022 | India        | 1 | 34    | M (1)        | Astrazeneca (1)                      | Brachial Plexus Neuropraxia (1)                                      | Discharged (1)                                              |
| Shields et al.,[207]        | 2022 | USA          | 6 | 36-84 | M (3); F (3) | Pfizer (4); Moderna (2)              | Parsonage Turner Syndrome (6)                                        | Discharged (6)                                              |
| Shimizu et al., [208]       | 2021 | Japan        | 1 | 88    | F (1)        | Pfizer (1)                           | Acute Disseminated Encephalomyelitis (1)                             | Recovering (1)                                              |
| Siddiqi et al., [209]       | 2022 | Pakistan     | 1 | 53    | M (1)        | Sinovac (1)                          | Miller Fisher Syndrome (1)                                           | Discharged (1)                                              |
| Silva et al., (a)[210]      | 2021 | Brazil       | 1 | 62    | F (1)        | Astrazeneca (1)                      | Guillain Barre Syndrome (1)                                          | Transferred to Rehabilitation Centre (1)                    |
| Silva et al., (b)[211]      | 2022 | Brazil       | 1 | 27    | F (1)        | Astrazeneca (1)                      | Transverse Myelitis (1)                                              | Discharged (1)                                              |
| Singh et al., [212]         | 2022 | USA          | 1 | 66    | F (1)        | Moderna (1)                          | Chronic Inflammatory Demyelinating Polyneuropathy (1)                | Transferred to Rehabilitation Centre (1)                    |
| Siriratnam et al., [213]    | 2022 | Australia    | 1 | 75    | F (1)        | Astrazeneca (1)                      | Acute Haemorrhagic Necrotizing Encephalopathy (1)                    | Died (1)                                                    |
| Sivji et al., [214]         | 2022 | India        | 1 | 49    | F (1)        | Astrazeneca (1)                      | Acute Disseminated Encephalomyelitis (1)                             | Discharged (1)                                              |
| Sluyts et al., [215]        | 2022 | Belgium      | 1 | 48    | M (1)        | Moderna (1)                          | Vaccine-induced Encephalitis (1)                                     | Discharged (1)                                              |
| Sobh et al., [216]          | 2022 | Saudi Arabia | 1 | 23    | F (1)        | Astrazeneca (1)                      | Cerebral Vein Thrombosis (1)                                         | Recovering (1)                                              |
| Souza et al., [217]         | 2022 | Australia    | 4 | 51-72 | M (4)        | Astrazeneca (4)                      | Inflammatory Demyelinating Polyneuropathy (4)                        | Discharged (3); Transferred to Rehabilitation Centre (1)    |
| Sriwastava et al., [218]    | 2021 | USA          | 3 | 41-67 | M (2); F (1) | Pfizer (1); Moderna (1); Janssen (1) | Demyelinating Polyneuropathy (1); Not described (2)                  | Discharged (3)                                              |
| Stefanou et al., [219]      | 2022 | Greece       | 1 | 47    | M (1)        | Janssen (1)                          | Guillain Barre Syndrome and Fulminant encephalomyelitis (1)          | Discharged (1)                                              |
| Su et al., [220]            | 2022 | Taiwan       | 1 | 39    | F (1)        | Astrazeneca (1)                      | Guillain Barre Syndrome (1)                                          | Waiting to be transferred to Rehabilitation Centre (1)      |
| Suri et al., [221]          | 2021 | India        | 1 | 47    | M (1)        | Astrazeneca (1)                      | Acute Onset Inflammatory Demyelinating Polyneuropathy (1)            | Discharged (1)                                              |
| Syed et al., [222]          | 2021 | USA          | 1 | 45    | M (1)        | Moderna (1)                          | Cerebral Venous Sinus Thrombosis (1)                                 | Discharged (1)                                              |
| Tabatabaee et al., [223]    | 2022 | Iran         | 3 | 32-46 | M (3)        | Astrazeneca (1); Sinopharm (2)       | Acute Motor Axonal Neuropathy subtype of Guillain Barre Syndrome (3) | Not described (3)                                           |
| Tagliaferri et al., [224]   | 2021 | USA          | 1 | 32    | F (1)        | Pfizer (1)                           | Multiple Sclerosis (1)                                               | Discharged (1)                                              |
| Takahashi et al., [225]     | 2022 | Japan        | 1 | 65    | F (1)        | Pfizer (1)                           | Acute Inflammatory Demyelinating Polyneuropathy (1)                  | Transferred to Rehabilitation Centre (1)                    |
| Tan et al., [226]           | 2021 | Malaysia     | 1 | 25    | F (1)        | Astrazeneca (1)                      | Longitudinal Extensive Transverse Myelitis (1)                       | Discharged (1)                                              |
| Tapdia et al., [227]        | 2022 | India        | 1 | 45    | M (1)        | Astrazeneca (1)                      | Frontal Lobe Syndrome (1)                                            | Discharged (1)                                              |
| Terreros-Caro et al., [228] | 2021 | Spain        | 1 | 50    | M (1)        | Pfizer (1)                           | Unilateral Bells Palsy (1)                                           | Recovering (1)                                              |
| Thant et al., [229]         | 2022 | USA          | 1 | 66    | M (1)        | Janssen (1)                          | Guillain Barre Syndrome (1)                                          | Recovering (1)                                              |
| Tiede et al., [230]         | 2021 | Germany      | 4 | 41-67 | F (4)        | Astrazeneca (4)                      | Cerebral Thromboembolic Events (4)                                   | Recovering (4)                                              |
| Toljan et al., [231]        | 2022 | USA          | 5 | 29-46 | M (2); F (3) | Pfizer (3); Moderna (2)              | Multiple Sclerosis (5)                                               | Transferred to Rehabilitation Centre (1); Not described (4) |
| Trimboli et al.,            | 2021 | Italy        | 1 | 25    | F (1)        | Pfizer (1)                           | Guillain Barre Syndrome (1)                                          | Transferred to Rehabilitation                               |

|                                |      |         |   |       |              |                 |                                                        |                                          |
|--------------------------------|------|---------|---|-------|--------------|-----------------|--------------------------------------------------------|------------------------------------------|
| [232]                          |      |         |   |       |              |                 |                                                        | Centre (1)                               |
| Vegezzi et al., [233]          | 2021 | Italy   | 1 | 44    | F (1)        | Astrazeneca (1) | Myelitis (1)                                           | Discharged (1)                           |
| Vitturi et al., [234]          | 2021 | Italy   | 1 | 51    | M (1)        | Astrazeneca (1) | Parsonage Turner Syndrome (1)                          | Discharged (1)                           |
| Vogrig et al., [235]           | 2021 | Italy   | 1 | 56    | F (1)        | Pfizer (1)      | Acute Disseminated Encephalomyelitis (1)               | Discharged (1)                           |
| Waheed et al., [236]           | 2021 | USA     | 1 | 82    | F (1)        | Pfizer (1)      | Guillain Barre Syndrome (1)                            | Transferred to Rehabilitation Centre (1) |
| Walter et al., [237]           | 2021 | Germany | 1 | 31    | M (1)        | Astrazeneca (1) | Thrombosis of Carotid Artery (1)                       | Recovering (1)                           |
| Yamakawa et al., [238]         | 2022 | Japan   | 1 | 30    | M (1)        | Pfizer (1)      | Miller Fisher Syndrome (1)                             | Discharged (1)                           |
| Yazdanpanah et al., [239]      | 2022 | Iran    | 1 | 37    | M (1)        | Sinopharm (1)   | Acute Disseminated Encephalomyelitis (1)               | Discharged (1)                           |
| Yu et al., [240]               | 2021 | China   | 1 | 36    | F (1)        | Sinovac (1)     | Bells Palsy and Keratoconjunctivitis (1)               | Discharged (1)                           |
| Zavala-Jonguitud et al., [241] | 2021 | Mexico  | 1 | 89    | M (1)        | Pfizer (1)      | Delirium (1)                                           | Discharged (1)                           |
| Zavari et al., [242]           | 2021 | Iran    | 1 | 26    | F (1)        | Astrazeneca (1) | Aseptic Meningitis (1)                                 | Discharged (1)                           |
| Zlotnik et al., [243]          | 2022 | Israel  | 1 | 48    | M (1)        | Pfizer (1)      | Anti-LGI1 Encephalitis (1)                             | Discharged (1)                           |
| Zubair et al., [244]           | 2022 | USA     | 1 | 30    | F (1)        | Janssen (1)     | Facial Diplegia Subtype of Guillain Barre Syndrome (1) | Discharged (1)                           |
| Zuhorn et al., [245]           | 2021 | Germany | 3 | 21-63 | M (1); F (2) | Astrazeneca (3) | Encephalitis (3)                                       | Discharged (3)                           |
